# Supplementary material for: Deep learning-based single-shot phase retrieval algorithm for surface plasmon resonance microscope based refractive index sensing application
Source: PubMed Central journal article supplement (PMC8357982; doi:10.1038/s41598-021-95593-4), 2021-08-11
Supplement: 41598_2021_95593_MOESM1_ESM.pdf [file 41598_2021_95593_MOESM1_ESM.pdf]

## Supplementary material

# Deep Learning-based Single Shot Phase Retrieval Algorithm for Surface Plasmon Resonance Microscope based Refractive Index Sensing Application

Kitsada Thadson <sup>1</sup>, Sarinporn Visitsattapongse <sup>1</sup> and Suejit Pechprasarn <sup>2,3\*</sup>

<sup>1</sup> Department of Biomedical Engineering, School of Engineering, King Mongkut's Institute of Technology Ladkrabang, Bangkok 10520, Thailand

<sup>2</sup> Shenzhen Key Laboratory for Micro-Scale Optical Information Technology, Nanophotonics Research Center, Institute of Microscale Optoelectronics, Shenzhen University, Shenzhen 518060, China

<sup>3</sup> College of Biomedical Engineering, Rangsit University, Pathum Thani 12000, Thailand

\* Correspondence: suejit.p@rsu.ac.th

### Reflection and transmission coefficients of a multilayer structure

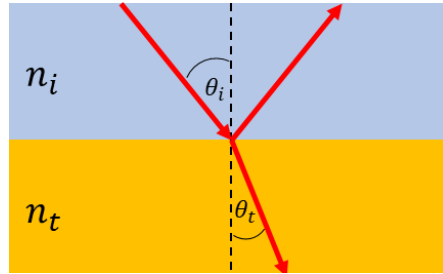

**Figure S1.** shows the reflectance and transmittance of incident light through different refractive indices of  $n_i$  and  $n_t$ .

In Fourier optics, Fresnel equation<sup>1</sup> is employed to compute the reflection and transmission coefficients of the different refractive index materials. The linear polarization of incident light is considered in two parts: p-polarization and s-polarization, as shown in eq. (1-2). Fig. S1. shows the reflected light from the interface between the two refractive indices and the propagation through the layer.

$$r_p = \frac{n_i \cos \theta_t - n_t \cos \theta_i}{n_i \cos \theta_t + n_t \cos \theta_i} \quad \text{Eq. 1.}$$

$$r_s = \frac{n_i \cos \theta_t - n_t \cos \theta_i}{n_i \cos \theta_t + n_t \cos \theta_i} \quad \text{Eq. 2.}$$

Where

$\theta_i$  is the incident angle in rad.

$\theta_t$  is the refractive angle in rad.

$n_i$  is the refractive index of the 1<sup>st</sup> medium.

$n_t$  is the refractive index of the 2<sup>nd</sup> medium.

$r_p$  is the reflection coefficient of the p-polarization.

$r_s$  is the reflection coefficient of the s-polarization.

For the multilayer scheme, as shown in Fig. S2., different phases in each layer must be considered for the total reflection and transmission coefficients computation using transfer matrix method<sup>1</sup>.

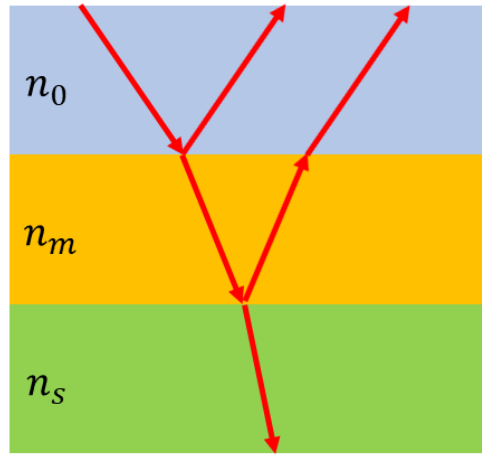

**Figure. S2.** three layers of the different refractive indices  $n_0$ ,  $n_1$ , and  $n_2$ .

The reflection coefficient of three layers can be calculated by:

1. Calculate the reflection coefficient at the interface between  $n_0$  and  $n_m$  for the p-polarization ( $r_{1p}$ ) and the s-polarization ( $r_{1s}$ ) using eq. (1-2).
2. Calculate the reflection coefficient at the interface between  $n_m$  and  $n_s$  for the p-polarization ( $r_{2p}$ ) and the s-polarization ( $r_{2s}$ ) using eq. (1-2)
3. The phase shift due to the wave propagation inside the  $n_m$  layer can be expressed in Eq. 3.

$$\phi_m = \exp\left(\frac{i2\pi n_m d_m \cos \theta_m}{\lambda}\right) \quad \text{eq. 3.}$$

Note that:

$\phi_m$  is the phase shift inside the  $n_m$  medium in rad.

$n_m$  is the refractive index of the medium.

$d_m$  is the thickness of the  $n_m$  medium.

$\theta_m$  is the refractive angle through the medium in rad.

$\lambda$  is the free-space wavelength.

4. The reflection coefficient can be computed using Eq. (4-5) for the p-polarization and the s-polarization, respectively.

$$r_p = \left( \frac{r_{01p} + r_{12p} \phi_m^2}{1 + (r_{01p} r_{12p} \phi_m^2)} \right) \quad \text{Eq. 4.}$$

$$r_s = \left( \frac{r_{01s} + r_{12s} \phi_m^2}{1 + (r_{01s} r_{12s} \phi_m^2)} \right) \quad \text{Eq. 5.}$$

## Reference

- 1 Katsidis, C. C. & Siapkis, D. I. General transfer-matrix method for optical multilayer systems with coherent, partially coherent, and incoherent interference. *Appl. Opt.* **41**, 3978-3987, doi:10.1364/AO.41.003978 (2002).
